# Supplementary material for: Updates to Protex for Simulating Proton Transfers in an Ionic Liquid
Source: PubMed Central journal article supplement (PMC11017242; doi:10.1021/acs.jpcb.3c07356), 2024-04-01
Supplement: jp3c07356_si_001.pdf [file jp3c07356_si_001.pdf]

# Supporting Information for Updates to Protex for Simulating Proton Transfers in an Ionic Liquid

Márta Gódnéy,<sup>†,‡</sup> Florian Joerg,<sup>†,‡</sup> Maximilian P.-P. Kovar,<sup>†</sup> and Christian  
Schröder<sup>\*,†</sup>

<sup>†</sup>*University of Vienna, Faculty of Chemistry, Department of Computational Biological  
Chemistry, Währinger Straße 17, 1090 Vienna, Austria*

<sup>‡</sup>*University of Vienna, Vienna Doctoral School in Chemistry (DoSChem), Währinger  
Straße 42, 1090 Vienna, Austria*

E-mail: christian.schroeder@univie.ac.at

## Parametrization

The original atomic parameters suggested by FFParam and the optimized parameters of HPTS<sup>4-</sup> and HPTSH<sup>3-</sup> are shown in tables 1 and 2. A structure with the atom labels corresponding to these tables is shown in fig. 1. The originally suggested and optimized internal coordinates are shown in tables 3-5. Mainly, bonds and angles containing sulfur atoms needed to be optimized. Many of the other parameters already resulted in a good agreement with QM potentials.

The force field parameters of MeOH were accepted from DGenFF without change. The parameters for MeOH<sub>2</sub><sup>+</sup> were derived using these as a starting point. The atomic parameters are shown in tables 6 and 7. The internal coordinates are shown in tables 8-10. These were taken directly from DGenFF, and the DUMH atom type was added.

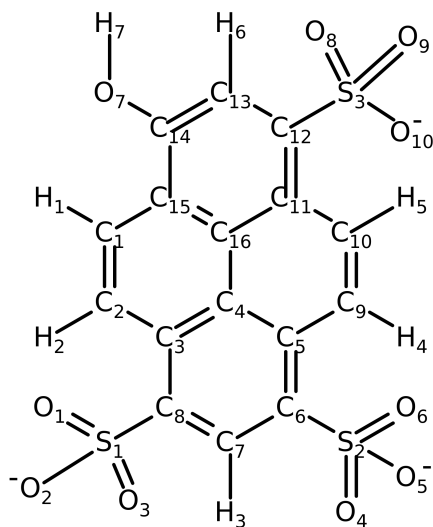

Figure 1: Atom labels of HPTSH.<sup>3-</sup> The atoms of HPTS<sup>4-</sup> were labeled analogously after the dummy H (H7) was added.

Table 1: Atomic parameters of HPTS<sup>4-</sup>, as first suggested by FFParam and after optimization. The charge of oxygens was assigned to their respective lone pairs and the polarizabilities of hydrogens to their neighboring heavy atoms. Thole parameters were not optimized.

| atom   | atom type | charge [e] |           | $\alpha$ [ $\text{\AA}^3$ ] |           | Thole [ $\text{\AA}$ ] |
|--------|-----------|------------|-----------|-----------------------------|-----------|------------------------|
|        |           | DGenFF     | optimized | DGenFF                      | optimized |                        |
| C1     | CD2R6A    | -0.115     | -0.159    | -1.5075                     | -1.8600   | 1.2701                 |
| C2     | CD2R6A    | -0.115     | -0.155    | -1.5075                     | -1.8900   | 1.2701                 |
| C3     | CD2R6A    | 0.011      | 0.060     | -1.5075                     | -1.9300   | 1.2701                 |
| C4     | CD2R6A    | -0.020     | 0.047     | -1.5075                     | -2.0200   | 1.2701                 |
| C5     | CD2R6A    | 0.011      | 0.063     | -1.5075                     | -1.9200   | 1.2701                 |
| C6     | CD2R6A    | -0.406     | -0.166    | -1.5075                     | -2.3300   | 1.2701                 |
| C7     | CD2R6A    | -0.293     | -0.109    | -1.5075                     | -1.4800   | 1.2701                 |
| C8     | CD2R6A    | -0.406     | -0.160    | -1.5075                     | -2.3200   | 1.2701                 |
| S1     | SD30A     | 1.349      | 1.150     | -1.0000                     | -1.6000   | 1.3000                 |
| O1     | OD2C2B    | 0.000      | 0.000     | -0.9310                     | -0.8967   | 1.0830                 |
| O2     | OD2C2B    | 0.000      | 0.000     | -0.9310                     | -0.8967   | 1.0830                 |
| O3     | OD2C2B    | 0.000      | 0.000     | -0.9310                     | -0.8967   | 1.0830                 |
| S2     | SD30A     | 1.349      | 1.135     | -1.0000                     | -1.5900   | 1.3000                 |
| O4     | OD2C2B    | 0.000      | 0.000     | -0.9310                     | -0.8967   | 1.0830                 |
| O5     | OD2C2B    | 0.000      | 0.000     | -0.9310                     | -0.8967   | 1.0830                 |
| O6     | OD2C2B    | 0.000      | 0.000     | -0.9310                     | -0.8967   | 1.0830                 |
| C9     | CD2R6A    | -0.115     | -0.166    | -1.5075                     | -1.9000   | 1.2701                 |
| C10    | CD2R6A    | -0.115     | -0.182    | -1.5075                     | -1.7100   | 1.2701                 |
| C11    | CD2R6A    | 0.011      | 0.081     | -1.5075                     | -2.0800   | 1.2701                 |
| C12    | CD2R6A    | -0.406     | -0.187    | -1.5075                     | -2.1800   | 1.2701                 |
| C13    | CD2R6A    | -0.683     | -0.238    | -1.5075                     | -1.8000   | 1.2701                 |
| C14    | CD2R6A    | 0.395      | 0.341     | -1.5075                     | -1.8700   | 1.2701                 |
| C15    | CD2R6A    | -0.309     | -0.042    | -1.5075                     | -2.1100   | 1.2701                 |
| C16    | CD2R6A    | -0.020     | -0.090    | -1.5075                     | -1.9600   | 1.2701                 |
| O7     | OD30E     | 0.000      | 0.000     | -1.0000                     | -1.1800   | 1.3000                 |
| S3     | SD30A     | 1.349      | 1.185     | -1.0000                     | -1.5900   | 1.3000                 |
| O8     | OD2C2B    | 0.000      | 0.000     | -0.9310                     | -0.9000   | 1.0830                 |
| O9     | OD2C2B    | 0.000      | 0.000     | -0.9310                     | -0.9000   | 1.0830                 |
| O10    | OD2C2B    | 0.000      | 0.000     | -0.9310                     | -0.9000   | 1.0830                 |
| H1     | HDR6A     | 0.115      | 0.044     |                             |           |                        |
| H2     | HDR6A     | 0.115      | 0.091     |                             |           |                        |
| H3     | HDR6A     | 0.305      | 0.090     |                             |           |                        |
| H4     | HDR6A     | 0.115      | 0.099     |                             |           |                        |
| H5     | HDR6A     | 0.115      | 0.098     |                             |           |                        |
| H6     | HDR6A     | 0.375      | 0.076     |                             |           |                        |
| H7     | DUMH      |            | 0.000     |                             |           |                        |
| LPO11  | LPDO1     | -0.325     | -0.351    |                             |           |                        |
| LPO12  | LPDO1     | -0.325     | -0.351    |                             |           |                        |
| LPO21  | LPDO1     | -0.325     | -0.336    |                             |           |                        |
| LPO22  | LPDO1     | -0.325     | -0.336    |                             |           |                        |
| LPO31  | LPDO1     | -0.325     | -0.350    |                             |           |                        |
| LPO32  | LPDO1     | -0.325     | -0.350    |                             |           |                        |
| LPO41  | LPDO1     | -0.325     | -0.335    |                             |           |                        |
| LPO42  | LPDO1     | -0.325     | -0.335    |                             |           |                        |
| LPO51  | LPDO1     | -0.325     | -0.344    |                             |           |                        |
| LPO52  | LPDO1     | -0.325     | -0.344    |                             |           |                        |
| LPO61  | LPDO1     | -0.325     | -0.344    |                             |           |                        |
| LPO62  | LPDO1     | -0.325     | -0.344    |                             |           |                        |
| LPO71  | LPDO1     | -0.381     | -0.337    |                             |           |                        |
| LPO72  | LPDO1     | -0.381     | -0.337    |                             |           |                        |
| LPO81  | LPDO1     | -0.325     | -0.352    |                             |           |                        |
| LPO82  | LPDO1     | -0.325     | -0.352    |                             |           |                        |
| LPO91  | LPDO1     | -0.325     | -0.352    |                             |           |                        |
| LPO92  | LPDO1     | -0.325     | -0.352    |                             |           |                        |
| LPO101 | LPDO1     | -0.325     | -0.352    |                             |           |                        |
| LPO102 | LPDO1     | -0.325     | -0.352    |                             |           |                        |

**Table 2: Atomic parameters of HPTSH<sup>3-</sup>, as first suggested by FFParm and after optimization.**

| atom   | atom type | charge [e] |           | $\alpha$ [ $\text{\AA}^3$ ] |           | Thole [ $\text{\AA}$ ] |
|--------|-----------|------------|-----------|-----------------------------|-----------|------------------------|
|        |           | DGenFF     | optimized | DGenFF                      | optimized |                        |
| C1     | CD2R6A    | -0.114     | -0.151    | -1.5075                     | -1.4800   | 1.2701                 |
| C2     | CD2R6A    | -0.115     | -0.170    | -1.5075                     | -1.3500   | 1.2701                 |
| C3     | CD2R6A    | 0.011      | 0.148     | -1.5075                     | -1.3400   | 1.2701                 |
| C4     | CD2R6A    | -0.020     | -0.039    | -1.5075                     | -1.4300   | 1.2701                 |
| C5     | CD2R6A    | 0.011      | 0.094     | -1.5075                     | -1.4700   | 1.2701                 |
| C6     | CD2R6A    | -0.406     | -0.150    | -1.5075                     | -1.7700   | 1.2701                 |
| C7     | CD2R6A    | -0.293     | -0.028    | -1.5075                     | -1.2100   | 1.2701                 |
| C8     | CD2R6A    | -0.406     | -0.179    | -1.5075                     | -1.5600   | 1.2701                 |
| S1     | SD30A     | 1.349      | 1.129     | -1.0000                     | -1.1000   | 1.3000                 |
| O1     | OD2C2B    | 0.000      | 0.000     | -0.9310                     | -0.7367   | 1.0830                 |
| O2     | OD2C2B    | 0.000      | 0.000     | -0.9310                     | -0.7367   | 1.0830                 |
| O3     | OD2C2B    | 0.000      | 0.000     | -0.9310                     | -0.7367   | 1.0830                 |
| S2     | SD30A     | 1.349      | 1.107     | -1.0000                     | -1.4200   | 1.3000                 |
| O4     | OD2C2B    | 0.000      | 0.000     | -0.9310                     | -0.7400   | 1.0830                 |
| O5     | OD2C2B    | 0.000      | 0.000     | -0.9310                     | -0.7400   | 1.0830                 |
| O6     | OD2C2B    | 0.000      | 0.000     | -0.9310                     | -0.7400   | 1.0830                 |
| C9     | CD2R6A    | -0.115     | -0.128    | -1.5075                     | -1.2700   | 1.2701                 |
| C10    | CD2R6A    | -0.115     | -0.182    | -1.5075                     | -1.3600   | 1.2701                 |
| C11    | CD2R6A    | 0.011      | 0.125     | -1.5075                     | -1.3300   | 1.2701                 |
| C12    | CD2R6A    | -0.405     | -0.153    | -1.5075                     | -1.5000   | 1.2701                 |
| C13    | CD2R6A    | -0.197     | -0.225    | -1.5075                     | -1.3000   | 1.2701                 |
| C14    | CD2R6A    | 0.103      | 0.177     | -1.5075                     | -1.2200   | 1.2701                 |
| C15    | CD2R6A    | 0.014      | 0.037     | -1.5075                     | -1.3900   | 1.2701                 |
| C16    | CD2R6A    | -0.019     | -0.059    | -1.5075                     | -1.3900   | 1.2701                 |
| O7     | OD31A     | 0.000      | 0.000     | -0.8315                     | -0.9700   | 0.7494                 |
| S3     | SD30A     | 1.349      | 1.159     | -1.0000                     | -1.1100   | 1.3000                 |
| O8     | OD2C2B    | 0.000      | 0.000     | -0.9310                     | -0.7433   | 1.0830                 |
| O9     | OD2C2B    | 0.000      | 0.000     | -0.9310                     | -0.7433   | 1.0830                 |
| O10    | OD2C2B    | 0.000      | 0.000     | -0.9310                     | -0.7433   | 1.0830                 |
| H1     | HDR6A     | 0.115      | 0.083     |                             |           |                        |
| H2     | HDR6A     | 0.115      | 0.122     |                             |           |                        |
| H3     | HDR6A     | 0.305      | 0.084     |                             |           |                        |
| H4     | HDR6A     | 0.115      | 0.120     |                             |           |                        |
| H5     | HDR6A     | 0.115      | 0.118     |                             |           |                        |
| H6     | HDR6A     | 0.210      | 0.100     |                             |           |                        |
| H7     | HDP1A     | 0.420      | 0.371     |                             |           |                        |
| LPO11  | LPDO1     | -0.325     | -0.340    |                             |           |                        |
| LPO12  | LPDO1     | -0.325     | -0.340    |                             |           |                        |
| LPO21  | LPDO1     | -0.325     | -0.317    |                             |           |                        |
| LPO22  | LPDO1     | -0.325     | -0.317    |                             |           |                        |
| LPO31  | LPDO1     | -0.325     | -0.339    |                             |           |                        |
| LPO32  | LPDO1     | -0.325     | -0.339    |                             |           |                        |
| LPO41  | LPDO1     | -0.325     | -0.317    |                             |           |                        |
| LPO42  | LPDO1     | -0.325     | -0.317    |                             |           |                        |
| LPO51  | LPDO1     | -0.325     | -0.331    |                             |           |                        |
| LPO52  | LPDO1     | -0.325     | -0.331    |                             |           |                        |
| LPO61  | LPDO1     | -0.325     | -0.332    |                             |           |                        |
| LPO62  | LPDO1     | -0.325     | -0.332    |                             |           |                        |
| LPO71  | LPD       | -0.269     | -0.277    |                             |           |                        |
| LPO72  | LPD       | -0.268     | -0.277    |                             |           |                        |
| LPO81  | LPDO1     | -0.325     | -0.338    |                             |           |                        |
| LPO82  | LPDO1     | -0.325     | -0.338    |                             |           |                        |
| LPO91  | LPDO1     | -0.325     | -0.332    |                             |           |                        |
| LPO92  | LPDO1     | -0.325     | -0.332    |                             |           |                        |
| LPO101 | LPDO1     | -0.325     | -0.332    |                             |           |                        |
| LPO102 | LPDO1     | -0.325     | -0.332    |                             |           |                        |

**Table 3: Bond parameters of HPTS<sup>4-</sup>/HPTSH<sup>3-</sup>, as suggested by FFParam and after optimization (the original parameters were accepted in cases where no optimized value is shown).**

| atom type | atom type | $k$ [kcal mol <sup>-1</sup> Å <sup>-2</sup> ] |           | $r_{eq}$ [Å] |           |
|-----------|-----------|-----------------------------------------------|-----------|--------------|-----------|
|           |           | DGenFF                                        | optimized | DGenFF       | optimized |
| CD2R6A    | SD30A     | 200.000                                       |           | 1.810        |           |
| CD2R6A    | HDR6A     | 340.00                                        |           | 1.080        |           |
| SD30A     | OD2C2B    | 155.500                                       | 320.500   | 2.036        | 1.500     |
| CD2R6A    | OD31A     | 334.300                                       |           | 1.411        |           |
| CD2R6A    | OD30E     | 334.300                                       | 350.300   | 1.411        | 1.311     |
| OD31A     | HDP1A     | 536.500                                       |           | 0.970        |           |
| OD30E     | DUMH      | 536.500                                       |           | 0.970        |           |
| LPDO1     | OD2C2B    | 0.000                                         |           | 0.000        |           |
| LPDO1     | OD30E     | 0.000                                         |           | 0.000        |           |

**Table 4: Angle parameters of HPTS<sup>4-</sup>/HPTSH<sup>3-</sup>, as suggested by FFParam and after optimization (the original parameters were accepted in cases where no optimized value is shown).**

| atom type | atom type | atom type | $k$ [kcal mol <sup>-1</sup> rad <sup>-2</sup> ] |           | $\theta_{eq}$ [°] |           |
|-----------|-----------|-----------|-------------------------------------------------|-----------|-------------------|-----------|
|           |           |           | DGenFF                                          | optimized | DGenFF            | optimized |
| CD2R6A    | CD2R6A    | CD2R6A    | 40.000                                          |           | 120.000           |           |
| CD2R6A    | CD2R6A    | HDR6A     | 30.000                                          |           | 120.000           |           |
| CD2R6A    | CD2R6A    | SD30A     | 43.000                                          | 20.000    | 113.200           | 118.200   |
| CD2R6A    | SD30A     | OD2C2B    | 60.000                                          |           | 104.250           |           |
| OD2C2B    | SD30A     | OD2C2B    | 60.000                                          | 105.000   | 116.000           | 112.800   |
| CD2R6A    | CD2R6A    | OD30E     | 45.200                                          | 90.200    | 120.000           | 123.000   |
| CD2R6A    | CD2R6A    | OD31A     | 75.200                                          |           | 122.000           |           |
| CD2R6A    | OD31A     | HDP1A     | 65.000                                          |           | 108.000           |           |
| CD2R6A    | OD30E     | DUMH      | 65.000                                          |           | 108.000           |           |

**Table 5: Dihedral parameters of HPTS<sup>4-</sup>/HPTSH<sup>3-</sup>, as suggested by FFParam (dihedral parameters were not optimized).**

| atom type | atom type | atom type | atom type | $k$ [kcal mol <sup>-1</sup> ] | $n$ | $\delta$ [°] |
|-----------|-----------|-----------|-----------|-------------------------------|-----|--------------|
| CD2R6A    | CD2R6A    | CD2R6A    | CD2R6A    | 2.800                         | 2   | 180.00       |
| CD2R6A    | CD2R6A    | CD2R6A    | HDR6A     | 4.200                         | 2   | 180.00       |
| HDR6A     | CD2R6A    | CD2R6A    | HDR6A     | 2.400                         | 2   | 180.00       |
| HDP1A     | OD31A     | CD2R6A    | CD2R6A    | 0.990                         | 2   | 180.00       |
| DUMH      | OD30E     | CD2R6A    | CD2R6A    | 0.990                         | 2   | 180.00       |
| OD31A     | CD2R6A    | CD2R6A    | CD2R6A    | 3.100                         | 2   | 180.00       |
| CD2R6A    | CD2R6A    | CD2R6A    | OD30E     | 3.100                         | 2   | 180.000      |
| OD31A     | CD2R6A    | CD2R6A    | HDR6A     | 4.200                         | 2   | 180.00       |
| OD30E     | CD2R6A    | CD2R6A    | HDR6A     | 4.200                         | 2   | 180.000      |
| CD2R6A    | CD2R6A    | CD2R6A    | SD30A     | 1.580                         | 1   | 180.000      |
| CD2R6A    | CD2R6A    | CD2R6A    | SD30A     | 1.450                         | 2   | 180.000      |
| CD2R6A    | CD2R6A    | SD30A     | OD2C2B    | 0.200                         | 3   | 0.000        |
| SD30A     | CD2R6A    | CD2R6A    | HDR6A     | 0.050                         | 2   | 0.000        |
| SD30A     | CD2R6A    | CD2R6A    | HDR6A     | 0.270                         | 1   | 0.000        |

**Table 6: Atomic parameters of MeOH.**

| atom | atom type | charge [e] | $\alpha$ [Å <sup>3</sup> ] | Thole [Å] |
|------|-----------|------------|----------------------------|-----------|
| C1   | CD33B     | -0.140     | -1.000                     | 1.3       |
| O1   | OD31H     | 0.000      | -1.028                     | 1.3       |
| HO1  | HDP1A     | 0.360      |                            |           |
| HO2  | DUMH      | 0.000      |                            |           |
| H1A  | HDA3B     | 0.080      |                            |           |
| H1B  | HDA3B     | 0.080      |                            |           |
| H1C  | HDA3B     | 0.080      |                            |           |
| LP1A | LPD       | -0.230     |                            |           |
| LP1B | LPD       | -0.230     |                            |           |

**Table 7: Atomic parameters of MeOH<sub>2</sub><sup>+</sup>.**

| atom | atom type | charge [e] | $\alpha$ [Å <sup>3</sup> ] | Thole [Å] |
|------|-----------|------------|----------------------------|-----------|
| C1   | CD33B     | -0.138     | -1.000                     | 1.3       |
| O1   | OD31H     | 0.000      | -1.028                     | 1.3       |
| HO1  | HDP1A     | 0.481      |                            |           |
| HO2  | HDP1A     | 0.481      |                            |           |
| H1A  | HDA3B     | 0.194      |                            |           |
| H1B  | HDA3B     | 0.194      |                            |           |
| H1C  | HDA3B     | 0.194      |                            |           |
| LP1A | LPD       | -0.203     |                            |           |
| LP1B | LPD       | -0.203     |                            |           |

**Table 8: Bond parameters for MeOH/MeOH<sub>2</sub><sup>+</sup>.**

| atom type | atom type | $k$ [kcal mol <sup>-1</sup> Å <sup>-2</sup> ] | $r_{eq}$ [Å] |
|-----------|-----------|-----------------------------------------------|--------------|
| OD31H     | CD33B     | 430.00                                        | 1.425        |
| OD31H     | HDP1A     | 536.50                                        | 0.970        |
| OD31H     | DUMH      | 536.50                                        | 0.970        |
| CD33B     | HDA3B     | 322.00                                        | 1.111        |
| OD31H     | LPD       | 0.00                                          | 0.000        |

**Table 9: Angle parameters of MeOH/MeOH<sub>2</sub><sup>+</sup>.**

| atom type | atom type | atom type | $k$<br>[kcal mol <sup>-1</sup> rad <sup>-2</sup> ] | $\theta_{eq}$ [°] | $k_{UB}$<br>[kcal mol <sup>-1</sup> rad <sup>-2</sup> ] | $S_0$ [Å] |
|-----------|-----------|-----------|----------------------------------------------------|-------------------|---------------------------------------------------------|-----------|
| HDA3B     | CD33B     | HDA3B     | 35.50                                              | 108.400           | 5.400                                                   | 1.802     |
| HDP1A     | OD31H     | HDP1A     | 35.50                                              | 120.000           | 5.400                                                   | 1.802     |
| DUMH      | OD31H     | HDP1A     | 35.50                                              | 120.000           | 5.400                                                   | 1.802     |
| CD33B     | OD31H     | HDP1A     | 58.20                                              | 106.000           | 0.000                                                   | 0.000     |
| CD33B     | OD31H     | DUMH      | 58.20                                              | 106.000           | 0.000                                                   | 0.000     |
| OD31H     | CD33B     | HDA3B     | 61.00                                              | 108.890           | 0.000                                                   | 0.000     |

**Table 10: Dihedral parameters of MeOH/MeOH<sub>2</sub><sup>+</sup>.**

| atom type | atom type | atom type | atom type | $k$ [kcal mol <sup>-1</sup> ] | $n$ | $\delta$ [°] |
|-----------|-----------|-----------|-----------|-------------------------------|-----|--------------|
| HDP1A     | OD31H     | CD33B     | HDA3B     | 0.179                         | 3   | 0.00         |
| DUMH      | OD31H     | CD33B     | HDA3B     | 0.179                         | 3   | 0.00         |

## Updated input file

An input file for starting a simulation with protex is given below to illustrate the updates we made (shown in blue).

```
1 import sys
2 import warnings
3 import os
4 from pathlib import Path
5
6 from simtk.openmm.app import StateDataReporter, PDBReporter, DCDReporter
7 # barostat for npT
8 from simtk.openmm import XmlSerializer, MonteCarloBarostat
9 from simtk.openmm.app import CharmmCrdFile, CharmmParameterSet,
    CharmmPsfFile
10 from simtk.openmm.app import PME, HBonds
11 from simtk.openmm.app import Simulation
12 from simtk.unit import angstroms, kelvin, picoseconds, atmosphere
13 from simtk.openmm import (
14     OpenMMEException,
15     Platform,
16     Context,
17     DrudeLangevinIntegrator,
18     DrudeNoseHooverIntegrator,
19     XmlSerializer,
20 )
21
22 import protex
23 from protex.testsystems import generate_im1h_oac_dummy_system, OAC_HOAC,
    IM1H_IM1
24 from protex.system import ProtexSystem, ProtexTemplates
25 from protex.reporter import ChargeReporter, DrudeTemperatureReporter,
    EnergyReporter
```



```

26 # new update class
27 from protex.update import KeepHUpdate, StateUpdate
28
29 allowed_updates = {}
30 # allowed updates according to simple protonation scheme
31 # r_min and r_max in nm, 0 ≤ prob ≤ 1
32 # cut-on and cut-off for distance-based probability
33 allowed_updates[frozenset(["IM1H", "OAC"])] = {"r_min": 0.140, "r_max":
    0.161, "prob": 0.994}
34 allowed_updates[frozenset(["IM1", "HOAC"])] = {"r_min": 0.140, "r_max":
    0.154, "prob": 0.098}
35 allowed_updates[frozenset(["IM1H", "IM1"])] = {"r_min": 0.140, "r_max":
    0.155, "prob": 0.201}
36 allowed_updates[frozenset(["HOAC", "OAC"])] = {"r_min": 0.140, "r_max":
    0.162, "prob": 0.684}
37
38 file_nr: int = int(sys.argv[1])
39 last_run: int = int(sys.argv[2])
40
41 Path("./out").mkdir(parents=True, exist_ok=True)
42 Path("./traj").mkdir(parents=True, exist_ok=True)
43 Path("./psf").mkdir(parents=True, exist_ok=True)
44
45 psf_file = "final.psf"
46 if file_nr > 1:
47     psf_file = f"psf/npt_{file_nr-1}.psf"
48 crd_file="final.crd"
49 psf_for_parameters = "psf_for_parameters.psf"
50 crd_for_parameters = "crd_for_parameters.crd"
51 npt_restart_file = "final_npt_7.rst"
52 PARA_FILES = [
53     "toppar_drude_master_protein_2013f_lj04_modhpts_chelph.str",
54     "hoac_d.str",

```

```

55     "im1h_d.str",
56     "im1_dummy_d.str",
57     "oac_dummy_d.str",
58 ]
59 para_files = [f"../../toppar_dummy/{para_file}" for para_file in
    PARA_FILES]
60 # option for npT (adds a MonteCarloBarostat) and nVT ensembles
61 ensemble = "nVT"
62
63 # obtain simulation object
64 simulation = generate_im1h_oac_dummy_system(
65     psf_file = psf_file,
66     crd_file = crd_file,
67     restart_file = npt_restart_file,
68     para_files = para_files,
69     ensemble = ensemble)
70 # simulation object with one molecule of each possible species for setting up templates
71 simulation_for_parameters = generate_im1h_oac_dummy_system(
72     psf_file = psf_for_parameters,
73     crd_file = crd_for_parameters,
74     para_files = para_files)
75
76 # get ionic liquid templates
77 templates = ProtexTemplates([OAC_HOAC, IM1H_IM1], (allowed_updates))
78
79 # wrap system in ProtexSystem
80 ionic_liquid = ProtexSystem(simulation, templates, simulation_for_parameters)
81
82 # load names to get the correct protonation states
83 if file_nr > 1:
84     ionic_liquid.load_updates(f"out/updates_{file_nr-1}.txt")
85     ionic_liquid.loadState(f"traj/npt_state_{file_nr-1}.rst")
86 # initialize update method

```

```

87 to_adapt = [("OAC", 150, frozenset(["IM1H", "OAC"])), ("HOAC", 350,
    frozenset(["IM1", "HOAC"]))]
88 # option to turn enhancements of update class on/off
89 update = KeepHUpdate(ionic_liquid, all_forces = True, to_adapt = to_adapt,
90     include_equivalent_atom = True, reorient = True)
91 # initialize state update class
92 # function for distance based probability: step (standard), linear or cosine
93 prob_function = linear
94 if file_nr == 1:
95     state_update = StateUpdate(update, prob_function = prob_function)
96 else:
97     # save and load update with the list of blocked transfers)
98     state_update = StateUpdate.load(f"out/state_update_file_nr-1.pkl", update)
99
100 dcd_save_freq = 200
101 state_save_freq = 200
102 ionic_liquid.simulation.reporters.append(DCDReporter(f"traj/npt_{file_nr}.
    dcd", int(dcd_save_freq)))
103 ionic_liquid.simulation.reporters.append(
104     StateDataReporter(
105         sys.stdout,
106         state_save_freq,
107         step=True,
108         time=True,
109         potentialEnergy=True,
110         kineticEnergy=True,
111         totalEnergy=True,
112         temperature=True,
113         volume=True,
114         density=True,
115     )
116 )

```

```

117 ionic_liquid.simulation.reporters.append(DrudeTemperatureReporter(f"out/
      drude_temp_{file_nr}.out",
118     state_save_freq))
119 ionic_liquid.simulation.reporters.append(EnergyReporter(f"out/energy_{
      file_nr}.out", state_save_freq*10))
120
121 dt = 0.0005 #ps
122 time_between_updates = 7 #ps
123 sim_time = 500 # ps
124 update_steps: int = 2 #only even numbers
125 steps_from_update_before_reporter: int = update_steps // 2
126 steps_from_update_after_reporter: int = update_steps // 2
127 if update_steps % 2 != 0:
128     warnings.warn("Probably working, not entirely tested. To be on the
      safe side use an even number for
129     'update_steps'", UserWarning)
130     steps_from_update_after_reporter += 1
131
132 steps_between_updates = int(time_between_updates/dt) #int division not
      working, dt too small
133 if ((1/dt)*time_between_updates)%(1/dt)!=0:
134     time_between_updates = round(steps_between_updates*dt,8)
135     msg = f"Not possible to have an integer step value with {
      time_between_updates}/{dt}! \
136     It is rounded down. Hence the effective time between updates
      is now {steps_between_updates*dt}"
137     warnings.warn(msg, UserWarning)
138
139 init_steps_between_updates = steps_between_updates -
      steps_from_update_before_reporter
140 #remove the steps taken during the updates process
141 real_steps_between_updates = steps_between_updates - update_steps
142 final_steps_between_updates = steps_from_update_after_reporter

```

```

143
144 transfer_cycles = sim_time/time_between_updates
145 total_steps = sim_time/dt
146 if file_nr == 1:
147     actual_transfer_cycles = transfer_cycles -1
148     assert total_steps == (init_steps_between_updates +
149         (real_steps_between_updates+update_steps)*(actual_transfer_cycles)
150         +final_steps_between_updates)
151     simulation.context.setTime(0.)
152 else:
153     actual_transfer_cycles = transfer_cycles
154     assert total_steps == (real_steps_between_updates+update_steps)*(
155         actual_transfer_cycles)
156     simulation.currentStep = int(total_steps*(file_nr-1)-1)
157
158 infos = {"dcd_save_freq": dcd_save_freq, "sim_time(ps)": sim_time, "
159     "update_steps": update_steps,
160     "steps_between_updates": steps_between_updates, "dt(ps)": dt}
161 charge_reporter = ChargeReporter(f"out/charge_changes_{file_nr}.out",
162     dcd_save_freq, ionic_liquid, header_data=infos)
163 ionic_liquid.simulation.reporters.append(charge_reporter)
164
165 print(f"{init_steps_between_updates=}")
166 print(f"{update_steps=}")
167 print(f"{real_steps_between_updates=}")
168 print(f"{final_steps_between_updates=}")
169
170 if file_nr == 1:
171     print("First run")
172     ionic_liquid.simulation.step(int(init_steps_between_updates))
173 for step in range(1,int(actual_transfer_cycles+1)):
174     print(step)
175     state_update.update(int(update_steps))

```

```

173     ionic_liquid.simulation.step(int(real_steps_between_updates))
174 if file_nr == last_run:
175     print(f"Last run (Nr. {last_run})")
176     ionic_liquid.simulation.step(int(final_steps_between_updates))
177
178 # restart files
179 state = ionic_liquid.simulation.context.getState( getPositions=True,
           getVelocities=True )
180 with open(f"traj/npt_{file_nr}.rst", 'w') as f:
181     f.write(XmlSerializer.serialize(state))
182
183 ionic_liquid.save_updates(f"out/updates_{file_nr}.txt")
184 ionic_liquid.write_psf("final.psf", f"psf/npt_{file_nr}.psf",
           psf_for_parameters)
185 ionic_liquid.saveState(f"traj/npt_state_{file_nr}.rst")
186 State_update.dump(f"out/state_update_file_nr.pkl")

```

## Conductivity

**Table 11: Conductivity  $\sigma$  of the pure IL, calculated with different versions of protex. (Data for Fig. 10 of the article.)**

| protex version    | $\sigma$ [ $\text{S m}^{-1}$ ] | STDEV [ $\text{S m}^{-1}$ ] |
|-------------------|--------------------------------|-----------------------------|
| without protex    | 0.21                           | 0.06                        |
| original protex   | 0.28                           | 0.09                        |
| 1.55 Å            | 0.31                           | 0.10                        |
| closest neighbors | 0.43                           | 0.13                        |
| RDF first shell   | 2.07                           | 0.88                        |

## Diffusion coefficients

**Table 12: Diffusion coefficients  $D$  [ $10^{-5} \text{ cm}^2 \text{ s}^{-1}$ ] of each species in the pure IL, calculated with different versions of protex. (Data for Fig. 11 of the article.)**

| protex version    | $\text{Im}_1$     | $\text{Im}_1\text{H}^+$ | HOAc              | $\text{OAc}^-$    |
|-------------------|-------------------|-------------------------|-------------------|-------------------|
| without protex    | $0.153 \pm 0.002$ | $0.045 \pm 0.002$       | $0.104 \pm 0.002$ | $0.043 \pm 0.002$ |
| original protex   | $0.196 \pm 0.005$ | $0.056 \pm 0.003$       | $0.114 \pm 0.003$ | $0.062 \pm 0.003$ |
| 1.55 Å            | $0.206 \pm 0.011$ | $0.060 \pm 0.005$       | $0.126 \pm 0.006$ | $0.068 \pm 0.008$ |
| closest neighbors | $0.216 \pm 0.013$ | $0.073 \pm 0.004$       | $0.133 \pm 0.010$ | $0.067 \pm 0.011$ |
| RDF first shell   | $0.302 \pm 0.020$ | $0.117 \pm 0.020$       | $0.201 \pm 0.027$ | $0.113 \pm 0.022$ |

## Probability correction

Below we show the time evolution of the number of species separately for each replica with varied strengths of the probability correction.

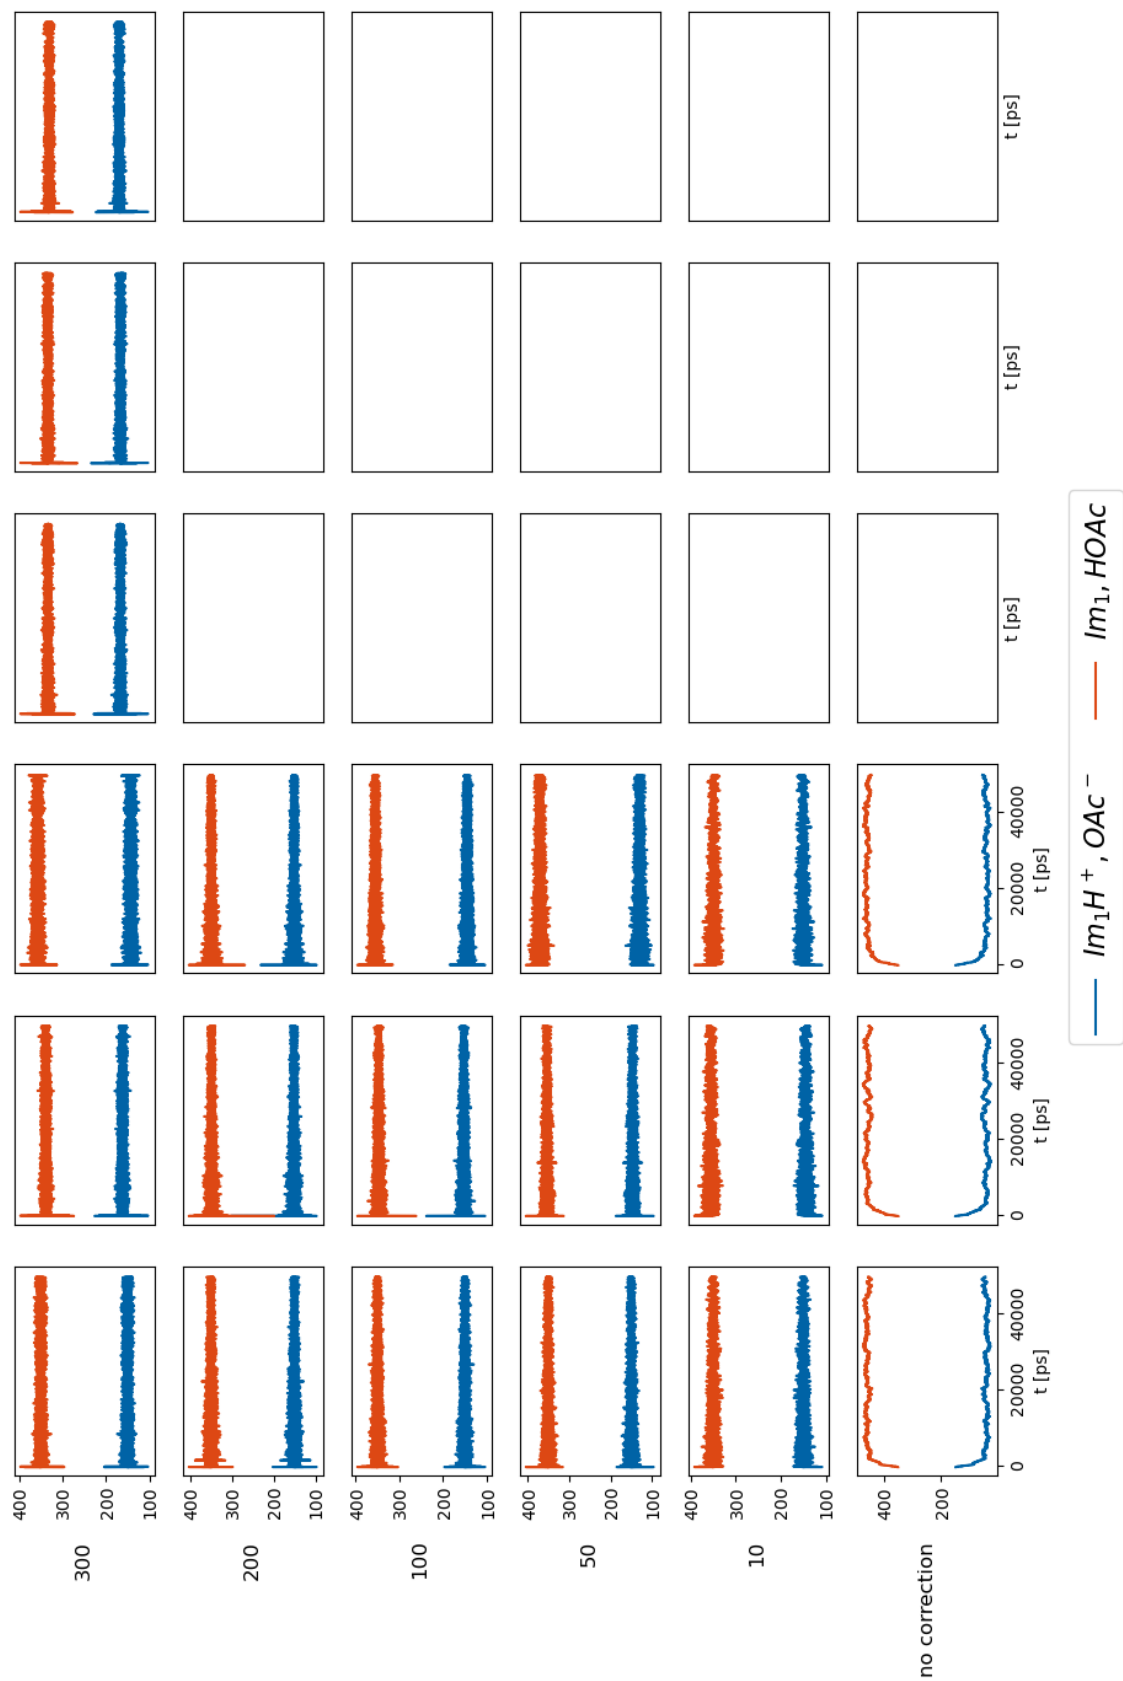

Figure 2: Time evolution of the number of each species with varied probability correction factors. Individual data for each replica. (Raw data for Fig. 8 of the article.)



# Density

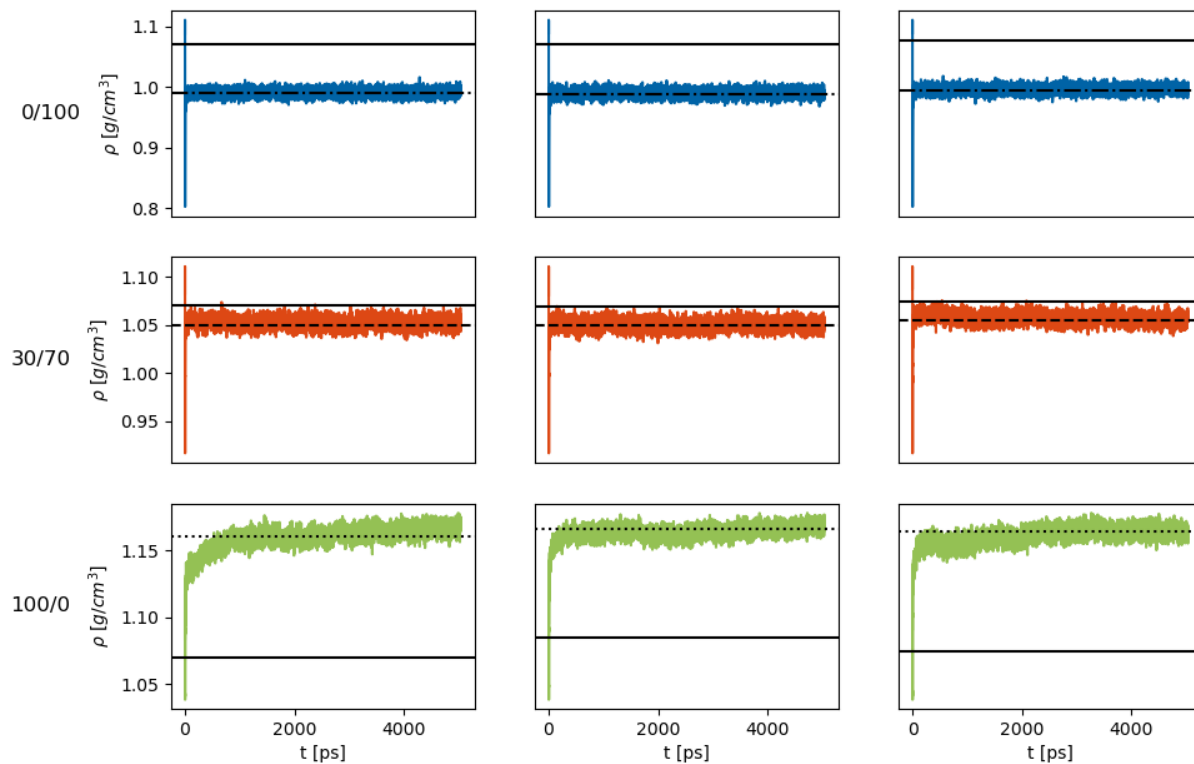

Figure 3: Time evolution of the density of the systems starting from 0 % (blue), 30 % (orange) and 100 % (green) ionic species during equilibration without proton transfers. Individual data for three replicas each. The average values used in the article are shown by the dash-dotted, dashed, and dotted black lines, respectively. The experimental density is shown by the solid black line.

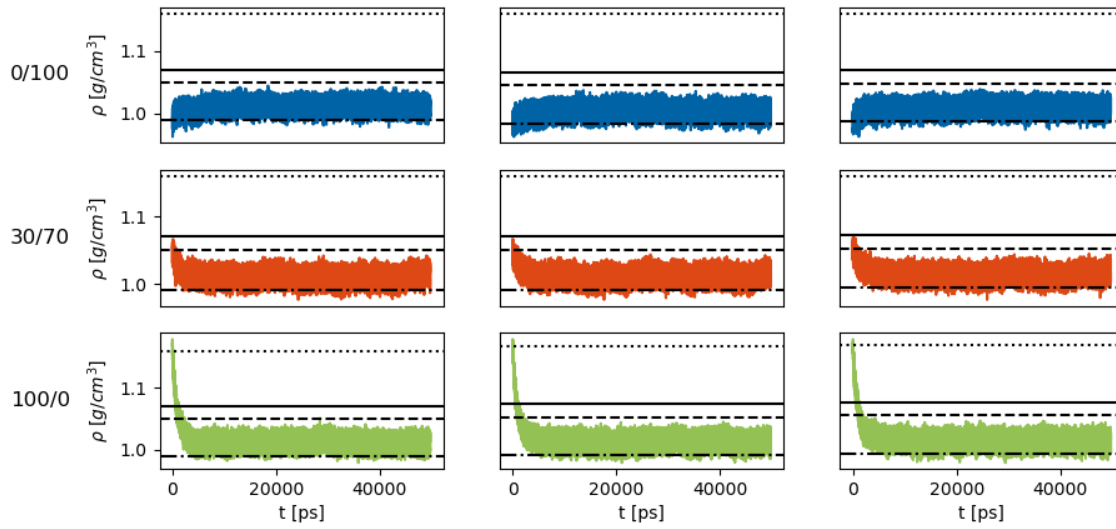

Figure 4: Time evolution of the density of the systems starting from 0 % (blue), 30 % (orange) and 100 % (green) ionic species during simulations with proton transfers. Individual data for each replica without any averaging. The average values used in the article are shown by the dash-dotted, dashed, and dotted black lines, respectively. The experimental density is shown by the solid black line. (Raw data for Fig. 7 of the article.)
